# Supplementary material
Source: MDPI journal article supplement (https://www.mdpi.com/2313-4321/8/2/32)
Supplement: s1 [file s1]

# Identifying optimal precursors for geopolymer composite mix design for different regional settings: A multi-objective optimization study

Mariam Abdulkareem <sup>a\*</sup>, Anastasija Komkova <sup>b</sup>, Jouni Havukainen <sup>a</sup>, Guillaume Habert <sup>b</sup>, Mika Horttanainen <sup>a</sup>

<sup>a</sup> Lappeenranta-Lahti University of Technology, School of Energy Systems, Department of Sustainability Science, P.O.Box 20, FI, 53851, Lappeenranta, Finland.

<sup>b</sup> ETH Zurich, Dept. of Civil, Environmental and Geomatic Engineering, Stefano-Franscini Platz 5, 8093, Zurich, Switzerland.

\* Corresponding author

Emails: Mariam.Abdulkareem@lut.fi

## SUPPLEMENTARY MATERIAL

**Table S1.** Energy requirement for pre-treatment.

| Energy for milling materials | MJ/kg | Unit      | References |
|------------------------------|-------|-----------|------------|
| Fly ash                      | 0.108 | 30 kWh/t  | [1]        |
| GGBFS                        | 0.661 |           | [2]        |
| Tailings                     | 0.216 | 60 kWh /t | [3]        |
| Metakaolin                   | 2.5   | 2.5 MJ/kg | [4]        |
| Steel slag                   | 0.216 | 60 kWh/t  | [3]        |
| Glass waste                  | 0.18  | 50 kWh /t | [5]        |
| MSWI BA                      | 0.18  | 50 kWh/t  | [6]        |

**Table S2.** Electricity costs.

| Electricity price | Unit (Euro/kWh) | Reference |
|-------------------|-----------------|-----------|
| Finland           | 0.0625          | [7]       |
| Belgium           | 0.0795          | [7]       |

**Table S3.** Weighted Environmental impacts of precursors & transportation, estimated using Gabi software.

|                                   | Weighted results |
|-----------------------------------|------------------|
| GGBFS                             | 1.64E-12         |
| Steel slag                        | 5.53E-13         |
| Fly ash                           | 2.77E-13         |
| Tailings                          | 5.53E-13         |
| metakaolin                        | 4.10E-12         |
| glass waste                       | 4.61E-13         |
| MSWI BA                           | 4.61E-13         |
| sewage sludge ash                 | 4.61E-13         |
| Transportation weighted emissions | 2.65e-16 km/kg   |

**Transportation distance of precursors**

The transportation distance is mainly road transportation as this study focuses on locally available materials.

**Table S4.** Transportation distances in km.

| To concrete plant (km) | Finland |     |      | Belgium |     |     |
|------------------------|---------|-----|------|---------|-----|-----|
|                        | Average | Min | Max  | Average | Min | Max |
| Fly ash                | 424     | 15  | 961  | 200     | 90  | 340 |
| GBFS                   | 366     | 61  | 829  | 135     | 30  | 235 |
| Mine tailings          | 460     | 6   | 1096 | 700     |     |     |
| Sewage sludge ash      | 376     | 4   | 948  | 112     | 1   | 296 |
| MSWI BA                | 376     | 4   | 948  | 112     | 1   | 296 |
| metakaolin             | 3300    |     |      | 800     |     |     |
| steel slag             | 424     | 61  | 829  | 135     | 30  | 235 |
| glass waste            | 389     | 1   | 1043 | 112     | 1   | 296 |

**Table S5.** Procurement and transportation costs and landfill costs in Finland.

|                      | Unit                | Reference |
|----------------------|---------------------|-----------|
| Fly ash              | 0.07 euro/kg        | [8]       |
| GBFS                 | 0.11 euro/kg        | [9]       |
| Mine tailings *      | 0                   |           |
| Sewage sludge ash *  | 0                   |           |
| MSWI BA *            | 0                   |           |
| metakaolin           | 0.255 euro/kg       | [10]      |
| steel slag           | 0.0032 euro/kg      | [11]      |
| glass waste          | 0.0523 euro/kg      | [12]      |
| Transportation costs | 0.000228 euro/km.kg | [13]      |
| Landfill costs       | 0.07 euro/kg        | [14]      |

\* Considered as waste materials that are not yet commercialised

**Table S6.** Procurement and transportation costs and landfill costs in Belgium.

|                      | Unit                 | Reference              |
|----------------------|----------------------|------------------------|
| Fly ash              | 0.07 euro/kg         | [15]                   |
| GBFS                 | 0.08 euro/kg         | internal communication |
| Mine tailings *      | 0                    |                        |
| Sewage sludge ash *  | 0                    |                        |
| MSWI BA *            | 0                    |                        |
| metakaolin           | 0.255 euro/kg        | [10]                   |
| steel slag           | 0.0032 euro/kg       | [11]                   |
| glass waste          | 0.0523 euro/kg       | [12]                   |
| Transportation costs | 0.000228 euro/km. kg | [13]                   |
| Landfill costs       | 0.0675 euro/kg       | [16,17]                |

\* Considered as waste materials that are not yet commercialised

**Table S7.** Availability of materials in Finland.

|  | Tonne/year | Normalization 0 to 1 | Reference |
|--|------------|----------------------|-----------|
|--|------------|----------------------|-----------|

|                   |            |        |      |
|-------------------|------------|--------|------|
| Fly ash           | 348,725    | 0.0232 | [18] |
| GBFS              | 370,000    | 0.0247 | [19] |
| Mine tailings     | 15,000,000 | 1.0000 | [20] |
| Sewage sludge ash | 76,000     | 0.0051 | [21] |
| MSWI BA           | 300,000    | 0.0200 | [22] |
| metakaolin        | -          | 0.0000 |      |
| steel slag        | 340,000    | 0.0227 | [19] |
| glass waste       | 89,985     | 0.0060 | [23] |

**Table S8.** Availability of materials in Belgium.

|                   | <b>Tonne/year</b> | <b>Normalization 0 to 1</b> | <b>Reference</b> |
|-------------------|-------------------|-----------------------------|------------------|
| Fly ash           | 1,202,740         | 1.0000                      | [24]             |
| GBFS              | 1,063,000         | 0.8838                      | [25]             |
| Mine tailings     | -                 | 0.0000                      |                  |
| Sewage sludge ash | 47,880            | 0.0398                      | [26]             |
| MSWI BA           | 401,000           | 0.3334                      | [27]             |
| metakaolin        | -                 | 0.0000                      |                  |
| steel slag        | 574,600           | 0.4777                      | [25]             |
| glass waste       | 343,937           | 0.2860                      | [28]             |

**Table S9.** Results of linear regression analyses.

[illegible]

## References

1. Fatec, Utilizing material side streams in manufacturing of for example concrete, mortars, and cementitious materials Fatec Oy, **2020**. <https://fatec.fi/> (accessed May 12, 2021).
2. Marceau, M.; VanGeem, M.G. Life Cycle Inventory of Slag Cement Manufacturing Process CTL Project No. 312012, **2003**. In Eighth CANMET/ACI International Conference on Fly Ash, Silica Fume, Slag and Natural Pozzolans in Concrete, 1–26. American Concrete Institute Farmington Hills, 2004. [https://www.ecocem.ie/wp-content/uploads/2016/08/ECL009\\_Life\\_Cycle\\_Inventory\\_of\\_GGBS\\_Cement\\_Concrete.pdf](https://www.ecocem.ie/wp-content/uploads/2016/08/ECL009_Life_Cycle_Inventory_of_GGBS_Cement_Concrete.pdf) (accessed on 29 January)
3. De Bakker, J. Energy Use of Fine Grinding in Mineral Processing. *Met. Mater. Trans. E* **2014**, 1, 8–19, <https://doi.org/10.1007/s40553-013-0001-6>.
4. Heath, A.; Paine, K.; McManus, M. Minimising the Global Warming Potential of Clay Based Geopolymers. *J. Clean. Prod.* **2014**, 78, 75–83, doi:10.1016/j.jclepro.2014.04.046.
5. Vinai, R.; Soutsos, M. Production of sodium silicate powder from waste glass cullet for alkali activation of alternative binders. *Cem. Concr. Res.* **2018**, 116, 45–56, <https://doi.org/10.1016/j.cemconres.2018.11.008>.
6. Torelli, D. Use of waste material in AAM concrete: application in circular economy, ETH Zurich, **2020**. <https://sc.ibi.ethz.ch/en/education/student-theses/master-projects/abgeschlossene-masterprojektarbeiten1.html>
7. Eurostat, Statistics|Electricity prices for non-household consumers - bi-annual data (from 2007 onwards), **2022**. [https://ec.europa.eu/eurostat/databrowser/view/nrg\\_pc\\_205/default/table?lang=en](https://ec.europa.eu/eurostat/databrowser/view/nrg_pc_205/default/table?lang=en) (accessed April 14, 2022).
8. Abdollahnejad, Z.; Pacheco-Torgal, F.; Félix, T.; Tahri, W.; Aguiar, J.B. Mix design, properties and cost analysis of fly ash-based geopolymer foam. *Constr. Build. Mater.* **2015**, 80, 18–30, <https://doi.org/10.1016/j.conbuildmat.2015.01.063>.
9. Chen, C.; Habert, G.; Bouzidi, Y.; Jullien, A.; Ventura, A. LCA allocation procedure used as an incitative method for waste recycling: An application to mineral additions in concrete. *Resour. Conserv. Recycl.* **2010**, 54, 1231–1240, <https://doi.org/10.1016/j.resconrec.2010.04.001>.
10. NLK, Ecosmart concrete project: Metakaolin Pre-feasibility study, Report EA2860, Vancouver, British Columbia, **2002**. <http://ecosmartconcrete.com/docs/trnlk02.pdf>.
11. Van Oss, H.G. SLAG-IRON AND STEEL, Semantic Scholar **2002**. <https://www.semanticscholar.org/paper/SLAG%E2%80%94IRON-AND-STEEL-Oss/061992ba0485caa0719e49377d8a6bdf3c380e9a>
12. Eurostat, Recycling – secondary material price indicator, **2021**, 1–10. [https://ec.europa.eu/eurostat/statistics-explained/index.php?title=Recycling\\_%E2%80%93\\_secondary\\_material\\_price\\_indicator](https://ec.europa.eu/eurostat/statistics-explained/index.php?title=Recycling_%E2%80%93_secondary_material_price_indicator)
13. Van der Meulen, S.; Grijspaardt, T.; Mars, W.; van der Geest, W.; Roest-Crollius, A.; Kiel, J. Cost Figures for Freight Transport—Final report, Research to Progress. Panteia **2020**. <https://www.kimnet.nl/binaries/kimnet/documenten/formulieren/2020/05/26/cost-figures-for-freight-transport/Cost+figures+for+freight+transport+-+final+report.pdf>
14. European Commission - Taxation and Customs Union, Taxes in Europe Database, v.3, **2017**. [https://ec.europa.eu/taxation\\_customs/tedb/taxDetails.html?id=252/1577833200](https://ec.europa.eu/taxation_customs/tedb/taxDetails.html?id=252/1577833200) (accessed April 14, 2022).
15. Kijlstra, Aanvullende prijslijst, **2019**. [https://www.betonmortelnederland.nl/Portals/0/Documenten/Aanvullende tarieven - 2019.pdf](https://www.betonmortelnederland.nl/Portals/0/Documenten/Aanvullende%20tarieven%20-2019.pdf) (accessed April 14, 2022).
16. CEWEP, CEWEP - The Confederation of European Waste-to-Energy Plants, **2021**. <https://www.cewep.eu/wp-content/uploads/2017/12/Landfill-taxes-and-bans-overview.pdf> [https://foes.de/pdf/Belgium Ecotax Rates.pdf](https://foes.de/pdf/Belgium%20Ecotax%20Rates.pdf) (accessed April 14, 2022).
17. Belgium Ecotax Rates, **2009**. General tax-base Specific tax-base Tax rate Euro Levy on energy Tax, <https://foes.de/pdf/Belgium%20Ecotax%20Rates.pdf>.
18. LUKE, Biomass atlas, **2017**. <https://biomassa-atlas.luke.fi/?lang=en> (accessed April 26, 2021).
19. Suopajarvi, H.; Haapala, A. SMARCTIC WP4 - Zero-waste integrates of metallurgical industry and bioeconomy, **2014**. [https://www.researchgate.net/publication/318275778\\_SMARCTIC\\_WP4\\_-\\_Zero-waste\\_integrates\\_of\\_metallurgical\\_industry\\_and\\_bioeconomy](https://www.researchgate.net/publication/318275778_SMARCTIC_WP4_-_Zero-waste_integrates_of_metallurgical_industry_and_bioeconomy) (accessed April 14, 2022).
20. Niemelin, T.; Autiola, M.; Jyrävä, H.; Lindroos, N.; Kulmala, A.; Österbacka, J.; Helaakoski, M. UTILISATION OF BY-PRODUCTS AND ALTERNATIVE CONSTRUCTION MATERIALS IN NEW MINE CONSTRUCTION, **2020**. [https://projektit.ramboll.fi/life/upacmic/matsku/deliverables/Other\\_deliverables/WASCON2018\\_UPACMIC\\_extended\\_abstract\\_2-5-2018.pdf](https://projektit.ramboll.fi/life/upacmic/matsku/deliverables/Other_deliverables/WASCON2018_UPACMIC_extended_abstract_2-5-2018.pdf) (accessed April 14, 2022).

21. Havukainen, J.; Nguyen, M.T.; Hermann, L.; Horttanainen, M.; Mikkilä, M.; Deviatkin, I.; Linnanen, L. Potential of phosphorus recovery from sewage sludge and manure ash by thermochemical treatment. *Waste Manag.* **2016**, *49*, 221–229, <https://doi.org/10.1016/j.wasman.2016.01.020>.
22. Suomen Erityisjäte Oy, MSWI bottom ash as a part of national decree: reducing environmental permit requirements | Suomen Erityisjäte Oy, **2021**. <https://www.erityisjate.fi/research-and-future/innovations-and-technologies/mswi-bottom-ash-as-a-part-of-national-decree-/> (accessed April 14, 2022).
23. Eurostat, Generation of waste by waste category, hazardousness and NACE Rev. 2 activity, **2022**. <http://appsso.eurostat.ec.europa.eu/nui/submitViewTableAction.do> (accessed April 14, 2022).
24. Eurostat. Coal production and consumption statistics. **2021**. ISSN- 2443-8219 [https://ec.europa.eu/eurostat/statistics-explained/index.php?title=Coal\\_production\\_and\\_consumption\\_statistics#Consumption\\_and\\_production\\_of\\_hard\\_coal](https://ec.europa.eu/eurostat/statistics-explained/index.php?title=Coal_production_and_consumption_statistics#Consumption_and_production_of_hard_coal) (accessed on 5 April 2021).
25. Eurofer, Map of EU steel production sites, **2021**. <https://www.eurofer.eu/assets/Uploads/Slide1.PNG> (accessed April 14, 2022).
26. Eurostat, Statistics | Sewage sludge production and disposal from urban wastewater (in dry substance (d.s)), **2022**. <https://ec.europa.eu/eurostat/databrowser/view/ten00030/default/table?lang=en> (accessed April 14, 2022).
27. Joseph, A.M.; Snellings, R.; Heede, P.V.D.; Matthys, S.; De Belie, N. The Use of Municipal Solid Waste Incineration Ash in Various Building Materials: A Belgian Point of View. *Materials* **2018**, *11*, 141, <https://doi.org/10.3390/ma11010141>.
28. Statbel, Packaging waste Génération de déchets d’emballages (tonnes), **2020**. <https://statbel.fgov.be/en/themes/environment/waste-and-pollution/packaging-waste#figures> (accessed April 14, 2022).
